# Supplementary material
Source: PubMed Central journal article supplement (PMC7895536)

Figure S1. Effect of curcumin on the viability of BEAS-2B cells. (A) Cell viability was analyzed by CCK-8 assay. (B) Cell apoptosis was assessed by Hoechst33258 staining.

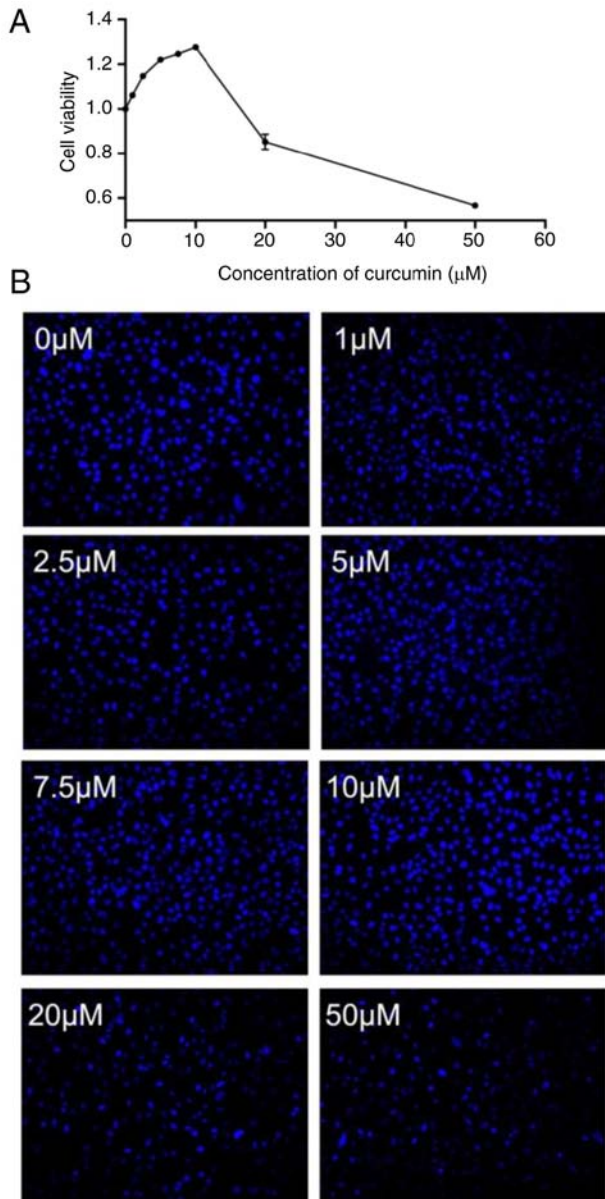

Figure S2. Effect of PM<sub>2.5</sub> on the production and expression of inflammatory factors. The production and mRNA expression of IFN- $\gamma$ , IL-6, IL-9, TNF- $\alpha$  and VEGF-A were assessed by (A) ELISA and (B) RT-qPCR. Data are presented as the means  $\pm$  SD; n=3, \*P<0.05 and \*\*P<0.01 compared with the control (0 mg/ml). PM<sub>2.5</sub>, fine particulate matter; IL, interleukin; IFN- $\gamma$ , interferon  $\gamma$ ; TNF- $\alpha$ , tumor necrosis factor  $\alpha$ ; VEGF, vascular endothelial growth factor.

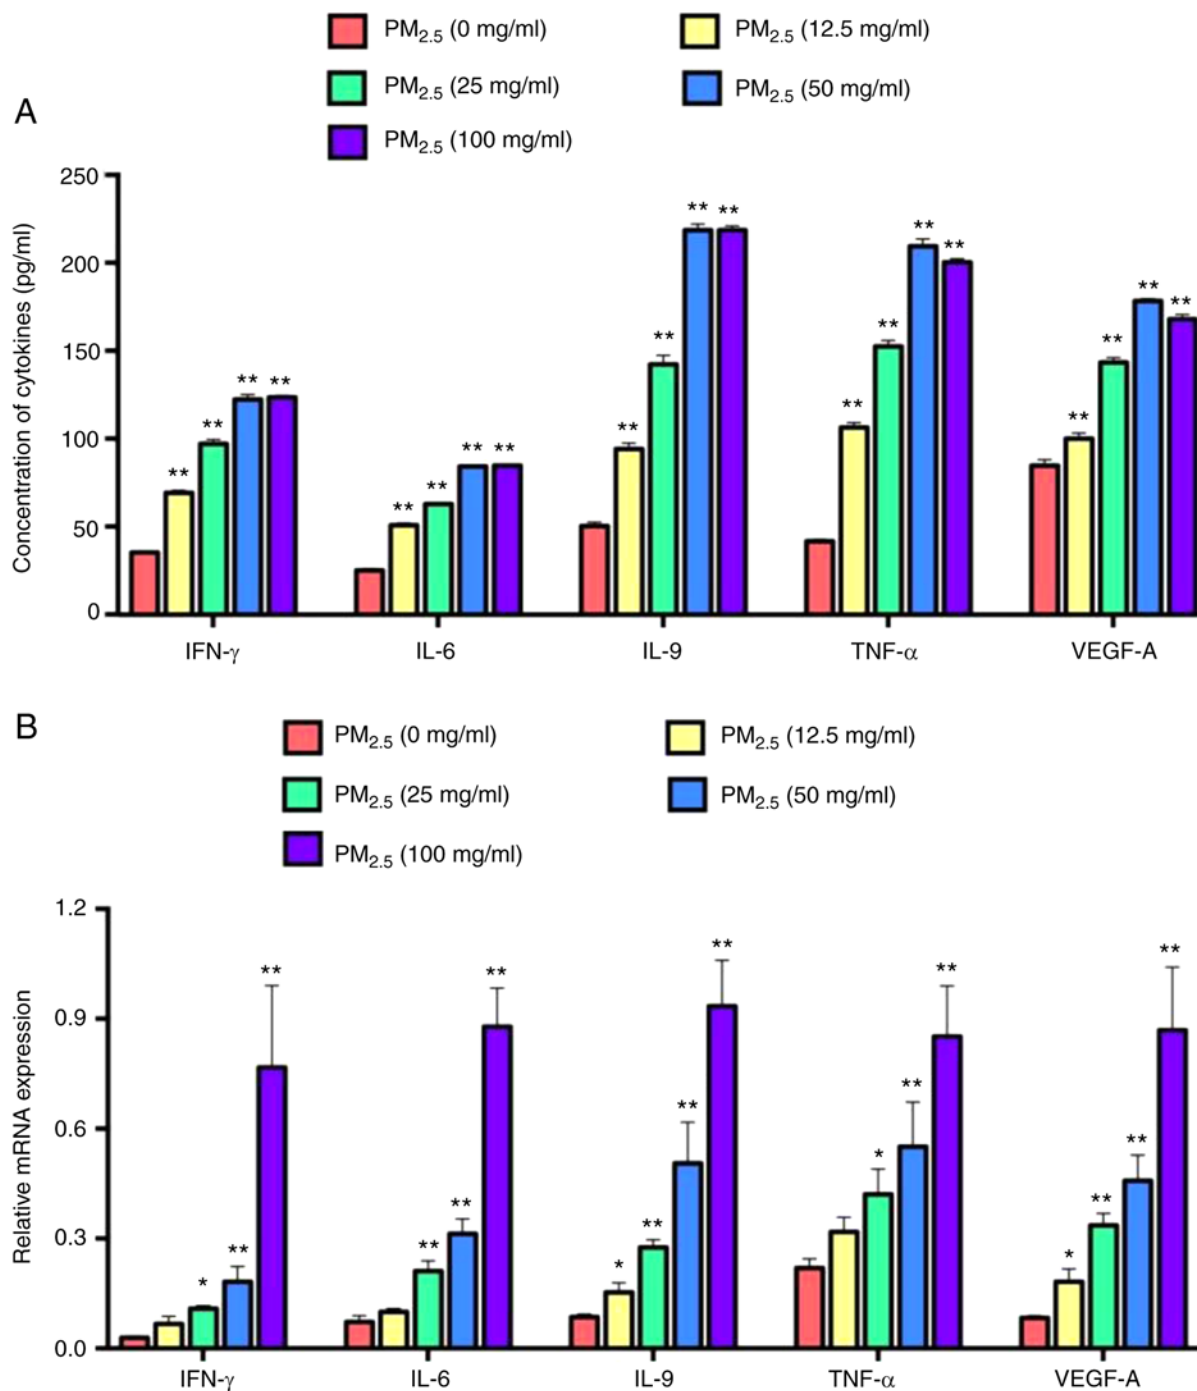

Figure S3. Effect of curcumin on the production and expression of inflammatory factors in PM<sub>2.5</sub>-exposed cells. The production and mRNA expression of IFN- $\gamma$ , IL-6, IL-9, TNF- $\alpha$  and VEGF-A were assessed by (A) ELISA and (B) RT-qPCR. Data are presented as the means  $\pm$  SD; n=3, \*P<0.05, \*\*P<0.01 and \*\*\*P<0.001 compared with the control. PM<sub>2.5</sub>, fine particulate matter; IL, interleukin; IFN- $\gamma$ , interferon  $\gamma$ ; TNF- $\alpha$ , tumor necrosis factor  $\alpha$ ; VEGF, vascular endothelial growth factor.

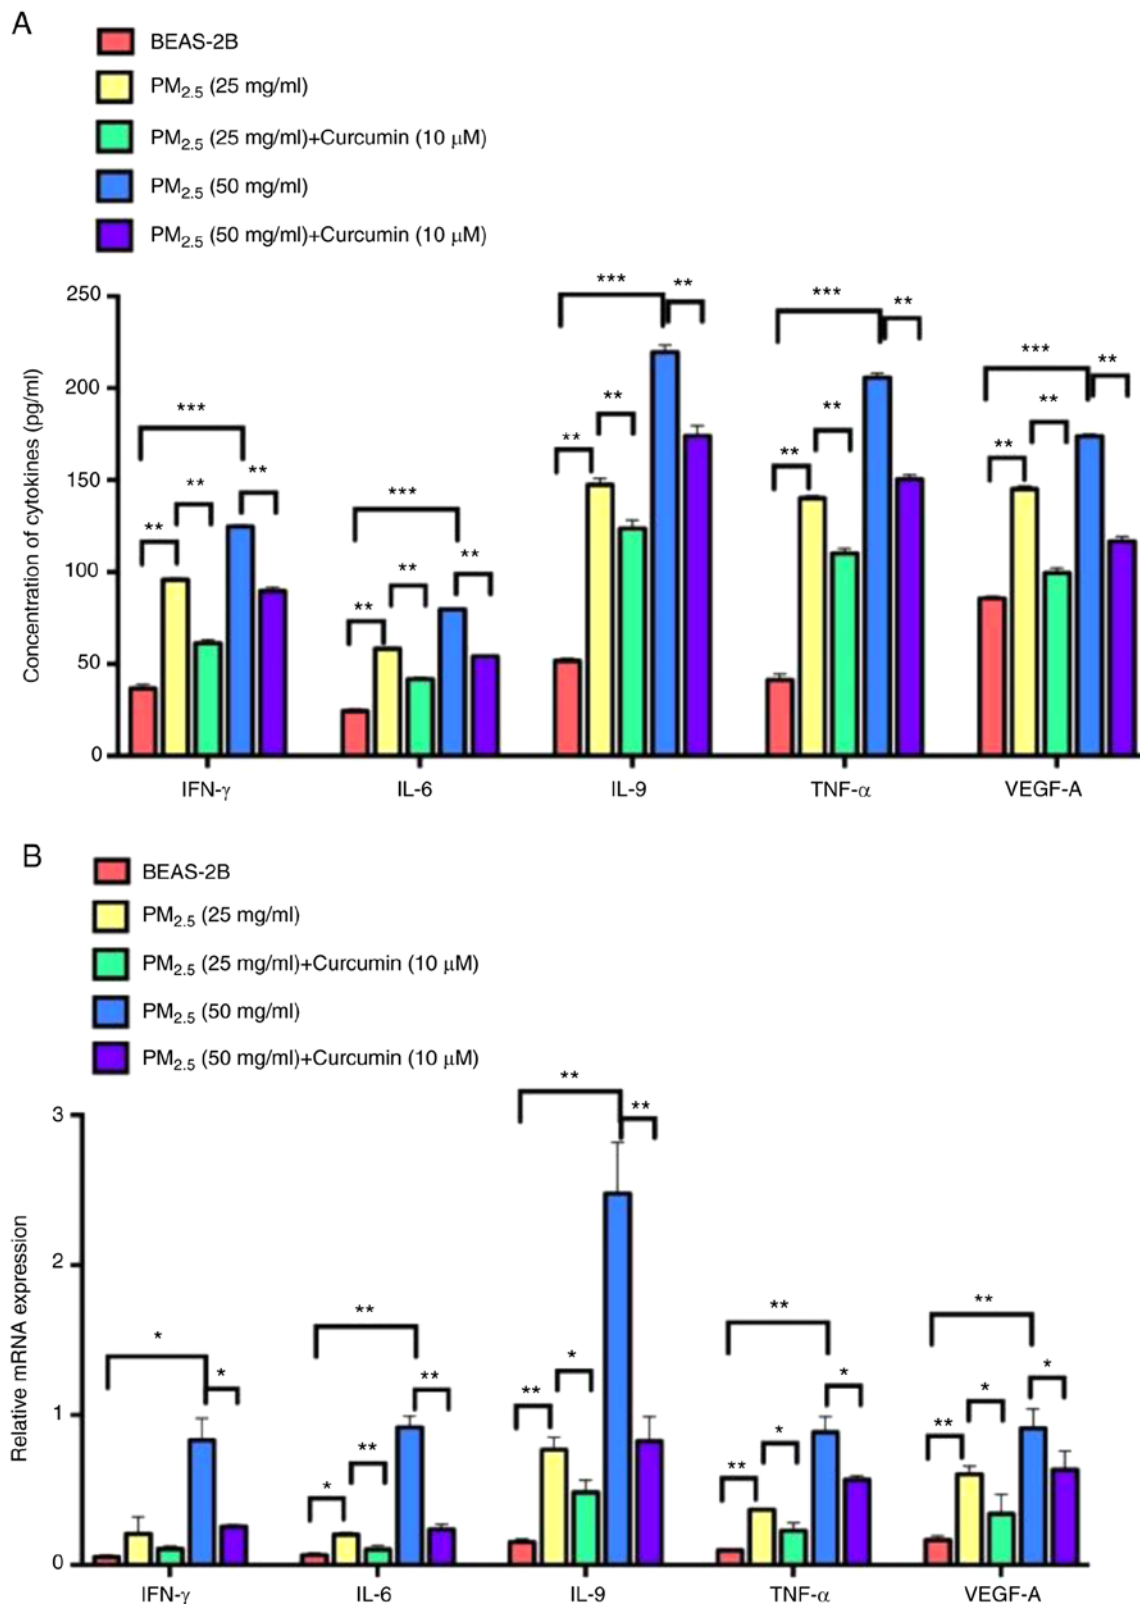

Supplement: Supplementary_Data.pdf [file Supplementary_Data.pdf]
